# Supplementary material for: The novel synaptonemal complex central element SCEP3 interlinks synapsis initiation and crossover formation in Arabidopsis thaliana
Source: Research Square preprint supplement (doi:10.21203/rs.3.rs-5394998/v1), 2024-11-21
Supplement: Supplementary file 1 [file 9e2e2c8650fc9dfc6cb14322.xlsx]

## Sheet: Tabelle1
Primer name	Sequences (5' to 3')	Purpose
LB_salk_LBb1.3	ATT TTG CCG ATT TCG GAA C	SALK T-DNA lines genotyping
LB_SAIL	TTCATAACCAATCTCGATACAC	SAIL T-DNA lines genotyping
SAILseq_210_G05_LP	GCAAAGTGAAAGAGACGATCG	scep3-1 genotyping
SAILseq_210_G05_RP	TGAGATTCATCATTTGGCTCC	scep3-1 genotyping; SAILseq_210_G05_RP + LB_SAIL for T-DNA
SALK_098044_LP	TGTAAACTGAGTGCAGCATGG	scep3-2 genotyping
SALK_098044_RP	GCTAAATTCTGGTTGCACTGC	scep3-2 genotyping; SALK_098044_RP + LB_salk_LBb1.3 for T-DNA
SAIL_170_F08_LP	GACTCATTGTTGCTTAATCCC	dmc1-2 genotyping
SAIL_170_F08_RP	TCCACTCGGAATAAAGCAATG	dmc1-2 genotyping; SAIL_170_F08_RP + LB_SAIL for T-DNA
SALK_143676_LP	TTGGCAGTTTCTCTTTCTTCG	asy3-1 genotyping
SALK_143676_RP	GAAAGCCCTGAAAATGCTACC	asy3-1 genotyping; SALK_143676_RP + LB_salk_LBb1.3 for T-DNA
SALK_137095_LP	TTGTCCGGTATGTTTTGTTCC	rec8-1 genotyping
SALK_137095_RP	ACGTGTAACCTATGGGCTGTG	rec8-1 genotyping; SALK_137095_RP + LB_salk_LBb1.3 for T-DNA
SALK_046272_LP	TCAGCTGGAGTTTTTAGCTCG	asy1-4 genotyping
SALK_046272_RP	GAACCATTTTGCAAGCTGAAC	asy1-4 genotyping; SALK_046272_RP + LB_salk_LBb1.3 for T-DNA
SAIL_1187_C06_LP	AATTTCAGTGCATTGCCAAAC	pch2-1 genotyping
SAIL_1187_C06_RP	GACAGACCTTTCCCATAAGCC	pch2-1 genotyping; SAIL_1187_C06_RP + LB_SAIL for T-DNA
SALK_026553_LP	CTGTTTCCCCTTTTCAACCTC	msh5-2 genotyping
SALK_026553_RP	TCAATCCATCATCCATTCCAG	msh5-2 genotyping; SALK_026553_RP + LB_salk_LBb1.3 for T-DNA
SALK_014624_LP	CAGTGGAAGAACAAGCAAAGG	hei10-2 genotyping
SALK_014624_RP	CCAAGAACCCGACTTTTTCTC	hei10-2 genotyping; SALK_014624_RP + LB_salk_LBb1.3 for T-DNA
SALK_068052_LP	TGTGTTCTTAGGTCTGCTGGG	zip4-2 genotyping
SALK_068052_RP	AAGCTTAGAAGCCCTGCTCTG	zip4-2 genotyping; SALK_068052_RP + LB_salk_LBb1.3 for T-DNA
SALK_091560_LP	AGCAACAAGGAAAAAGGTCAC	mer3-1 genotyping
SALK_091560_RP	TACTTTGTCATCAGCCTTCCG	mer3-1 genotyping; SALK_091560_RP + LB_salk_LBb1.3 for T-DNA
SALK_057589_LP	AGCTTAAGCGAATCTTACCGG	shoc1-1 genotyping
SALK_057589_RP	TGGTTCAATGGCTTTTTGAAG	shoc1-1 genotyping; SALK_057589_RP + LB_salk_LBb1.3 for T-DNA
SALK_107515_LP	TGGTGAAATCTAGCAACCCAG	mus81-2 genotyping
SALK_107515_RP	AATTTTCCACAAACCCTTTGG	mus81-2 genotyping; SALK_107515_RP + LB_salk_LBb1.3 for T-DNA
SALK_015849_LP	GTAGCCCCAAGAAAGTTTTGG	mlh3-1 genotyping
SALK_015849_RP	GCCTAGGAATGTCAAAGGGAC	mlh3-1 genotyping; SALK_015849_RP+ LB_salk_LBb1.3 for T-DNA
SALK_050581_LP	CTCGCATTTGCTGGTTTAAAGAG	zyp1b genotyping
SALK_050581_RP	TGCGTATATTGCTAGGTTTATATTG	zyp1b genotyping; SALK_050581_RP + LB_salk_LBb1.3 for T-DNA
zyp1a_crispr_LP	CTCGCATTTGCTGGTTTAAAGAGTC	zyp1a genotyping; PCR followed by digestion with HindIII
zyp1a_crispr_RP	GAATAGTTAGCAGATTCATATTTCAC	zyp1a genotyping; PCR followed by digestion with HindIII
scep3_3_LP	GTTCTACAGATACTCAGGAC	scep3-3 and scep3-4 genotyping by Sanger sequencing
scep3_3_RP	TTGTTGGCATTTTCTGGATC	scep3-3 and scep3-4 genotyping by Sanger sequencing
oCmYLCV	TGCTCTTCGCGCTGGCAGACATACTGTCCCAC	Golden Gate cloning of gRNAs into pMOD_B2103
CSY_gRNA1	TCGTCTCCTGGCTTTGGCTCCTGCCTATACGGCAGTGAAC	Golden Gate cloning of gRNAs into pMOD_B2103
REP_gRNA1	TCGTCTCAGCCAAAATCCATGTTTTAGAGCTAGAAATAGC	Golden Gate cloning of gRNAs into pMOD_B2103
CSY_gRNA2	TCGTCTCCACTTGTCTAGTTCTGCCTATACGGCAGTGAAC	Golden Gate cloning of gRNAs into pMOD_B2103
REP_gRNA2	TCGTCTCAAAGTTCCCTCCAGTTTTAGAGCTAGAAATAGC	Golden Gate cloning of gRNAs into pMOD_B2103
CSY_term	TGCTCTTCTGACCTGCCTATACGGCAGTGAAC	Golden Gate cloning of gRNAs into pMOD_B2103
CmYLCV TC320	CTAGAAGTAGTCAAGGCGGC	Colony PCR and Sanger sequencing
TC089R	GGAACCCTAATTCCCTTATCTGG	Colony PCR and Sanger sequencing
BD-ZYP1b_F	atatggccatggaggccgaattcATGCAGAAGTTAGGGTTTC	Cloing of construct for Y2H; also for ZYP1a cloning
BD-ZYP1b_R	ttatgcggccgctgcaggtcgacTCAATCAAATGCATAGGGATC	Cloing of construct for Y2H; also for ZYP1a cloning
BD-ZYP1b 1-48_F	atatggccatggaggccgaattcATGCAGAAGTTAGGGTTTC	Cloing of construct for Y2H
BD-ZYP1b 1-48_R	ttatgcggccgctgcaggtcgactcaTGCTGTGAGTTTCAAATTC	Cloing of construct for Y2H
BD-ZYP1b 49-400_F	atatggccatggaggccgaattcGAGAAACTGGTGAAGGATC	Cloing of construct for Y2H
BD-ZYP1b 49-400_R	ttatgcggccgctgcaggtcgactcaTGCTTCAAACTCCAATTTATC	Cloing of construct for Y2H
BD-ZYP1b 401-718_F	atatggccatggaggccgaattcAAAGGACTGGTTTTAAAGAATG	Cloing of construct for Y2H
BD-ZYP1b 401-718_R	ttatgcggccgctgcaggtcgactcaTTCTTGCTCCTCAGGTGGA	Cloing of construct for Y2H
BD-ZYP1b 719-856_F	atatggccatggaggccgaattcGTAAACTCAAACAAGGACT	Cloing of construct for Y2H
BD-ZYP1b 719-856_R	ttatgcggccgctgcaggtcgacTCAATCAAATGCATAGGGATC	Cloing of construct for Y2H
BD-ZYP1b 719-835_F	atatggccatggaggccgGTAAACTCAAACAAGGACTATTC	Cloing of construct for Y2H
BD-ZYP1b 719-835_F	ttatgcggccgctgcaggtcaTGCAGAGTGAGGATGATCG	Cloing of construct for Y2H
AD-SCEP3_F	tggccatggaggccagtgaaTCTGCACCTGCTAAAAGAAG	Cloing of construct for Y2H
AD-SCEP3_R	tgcagctcgagctcgatgTCATGTGTCCCTTAAAGTC	Cloing of construct for Y2H
AD-SCEP3 1-733_F	tggccatggaggccagtgaaTCTGCACCTGCTAAAAGAAG	Cloing of construct for Y2H
AD-SCEP3 1-733_R	tgcagctcgagctcgatgtcaCTCCGTGATTGGGATTTCCA	Cloing of construct for Y2H
AD-SCEP3 734-803_F	tggccatggaggccagtgaaAATGCTGACAACATAGAGAAAG	Cloing of construct for Y2H
AD-SCEP3 734-803_R	tgcagctcgagctcgatgTCATGTGTCCCTTAAAGTC	Cloing of construct for Y2H
BD-SCEP1_F	atatggccatggaggccgaattcATGGAGGAGTATCTACAGTATATG	Cloing of construct for Y2H
BD-SCEP1_R	ttatgcggccgctgcaggtcgacCTAATCTAAACCAACACTG	Cloing of construct for Y2H
BD-SCEP2_F	atatggccatggaggccgaattcATGGCGGGAATCGATACGCAG	Cloing of construct for Y2H
BD-SCEP2_R	ttatgcggccgctgcaggtcgacTTATGCTTCACCAGCTAACAG	Cloing of construct for Y2H
BD-ASY4_F	atatggccatggaggccgaattcTCGTCTACCAGAAGAGGCAC	Cloing of construct for Y2H
BD-ASY4_R	ttatgcggccgctgcaggtcgacTCACTCATCAGGTGGGAATTC	Cloing of construct for Y2H
BD-COMET_F	atatggccatggaggccgaattcATGGAAATGGCGGAAGGGGA	Cloing of construct for Y2H
BD-COMET_R	ttatgcggccgctgcaggtcgacTTATTCTTCAACTGGTTGATG	Cloing of construct for Y2H
BD-PRD3_F	atatggccatggaggccgAAGATGAATATTAACAAAGCCTGCGATC	Cloing of construct for Y2H
BD-PRD3_R	ttatgcggccgctgcaggtcgacTCAGTTAATTATTATGGGGT	Cloing of construct for Y2H
BD-ZIP4-Cter470_F	atatggccatggaggccgaaAAATCAATGCTCTATATTCCAC	Cloing of construct for Y2H
BD-ZIP4-Cter470_R	ttatgcggccgctgcaggCTAAGCAGAAGAAACTTTGGTC	Cloing of construct for Y2H
BD-HEI10_F	atatggccatggaggccgaattcATGAGATGCAACGCGTGTTG	Cloing of construct for Y2H
BD-HEI10_R	ttatgcggccgctgcaggtcgacCTATAGCGTGAACAGCTGAG	Cloing of construct for Y2H
BD-MER3_F	atatggccatggaggccgaattcATGGATACACACACGCTCA	Cloing of construct for Y2H
BD-MER3_R	ttatgcggccgctgcaggtcgacTTAGAAGAGCCTTTTGATGAG	Cloing of construct for Y2H
BD-PTD_F	atatggccatggaggccgaattcATGGCGACGGCGGGATCAAG	Cloing of construct for Y2H
BD-PTD_R	ttatgcggccgctgcaggtcgacTCAGTTGAATTTGGGACTG	Cloing of construct for Y2H
AD-HvSCEP3_F	tggccatggaggccagtgaaATGGATGAATCACGAAAAAGAG	Cloing of construct for Y2H
AD-HvSCEP3_R	tgcagctcgagctcgatgTCAATGAGTATCCATTGTGAC	Cloing of construct for Y2H
BD-HvZYP1_F	atatggccatggaggccgaattcATGCAGAAGCTGGGGCTCTC	Cloing of construct for Y2H
BD-HvZYP1_R	ttatgcggccgctgcaggtcgacCTAGCCAAATGCAAAAGGGTC	Cloing of construct for Y2H
